1 **Transposable element mobilization in interspecific yeast hybrids**

2 Caiti Smukowski Heil<sup>1,2</sup>, Kira Patterson<sup>1,3</sup>, Angela Shang-Mei Hickey<sup>1,4</sup>, Erica Alcantara<sup>1,5</sup>, and Maitreya  
3 J. Dunham<sup>1</sup>

4

5 Author Affiliations

6 <sup>1</sup>Department of Genome Sciences, University of Washington, Seattle, WA

7 <sup>2</sup>Current address: Department of Biological Sciences, North Carolina State University, Raleigh, NC

8 <sup>3</sup>Current address: National Heart, Lung, and Blood Institute, Bethesda, MD

9 <sup>4</sup>Current address: Center for Genomics and Systems Biology, New York University, New York, NY

10 <sup>5</sup>Current address: The New York Institute of Technology College of Osteopathic Medicine, Glen Head,  
11 NY

12

13

14

15

16

17

18

19

20 **Running title: Transposable elements in hybrids**

21 **Keywords:** hybridization, transposable elements, transposition rate, Ty element, *Saccharomyces*

22 **Corresponding authors:**

23 Caiti Smukowski Heil

24 Department of Biological Sciences, North Carolina State University

25 112 Derieux Place, Thomas Hall 3510

26 Raleigh, NC 27607

27 919-515-2709

28 [cheil@ncsu.edu](mailto:cheil@ncsu.edu)

29

30 Maitreya J. Dunham

31 Department of Genome Sciences, University of Washington

32 Foegen Building S-250, Box 355065

33 3720 15th Ave NE, Seattle WA 98195

34 206-543-2338

35 [maitreya@uw.edu](mailto:maitreya@uw.edu)

36

37

38 **Abstract**

39 Barbara McClintock first hypothesized that interspecific hybridization could provide a “genomic shock”  
40 that leads to the mobilization of transposable elements. This hypothesis is based on the idea that  
41 regulation of transposable element movement is potentially disrupted in hybrids. However, the handful of  
42 studies testing this hypothesis have yielded mixed results. Here, we set out to identify if hybridization can  
43 increase transposition rate and facilitate colonization of transposable elements in *Saccharomyces*  
44 *cerevisiae* x *Saccharomyces uvarum* interspecific yeast hybrids. *S. cerevisiae* have a small number of  
45 active long terminal repeat (LTR) retrotransposons (Ty elements), while their distant relative *S. uvarum*  
46 have lost the Ty elements active in *S. cerevisiae*. While the regulation system of Ty elements is known in  
47 *S. cerevisiae*, it is unclear how Ty elements are regulated in other *Saccharomyces* species, and what  
48 mechanisms contributed to the loss of most classes of Ty elements in *S. uvarum*. Therefore, we first  
49 assessed whether transposable elements could insert in the *S. uvarum* sub-genome of a *S. cerevisiae* x *S.*  
50 *uvarum* hybrid. We induced transposition to occur in these hybrids and developed a sequencing technique  
51 to show that Ty elements insert readily and non-randomly in the *S. uvarum* genome. We then used an *in*  
52 *vivo* reporter construct to directly measure transposition rate in hybrids, demonstrating that hybridization  
53 itself does not alter rate of mobilization. However, we surprisingly show that species-specific  
54 mitochondrial inheritance can change transposition rate by an order of magnitude. Overall, our results  
55 provide evidence that hybridization can facilitate the introduction of transposable elements across species  
56 boundaries and alter transposition via mitochondrial transmission, but that this does not lead to  
57 unrestrained proliferation of transposable elements suggested by the genomic shock theory.

58

59

60

61

## 62 **Introduction**

63 Transposable elements (TEs) are mobile, repetitive genetic elements that have colonized nearly every  
64 organism across the tree of life. TEs self-encode machinery to either replicate or excise themselves from  
65 one genomic location and re-insert at another genomic location, which can disrupt genes or gene  
66 expression and promote chromosomal rearrangements through ectopic recombination. Due to the high  
67 potential of fitness costs of these mutations, most organisms have evolved host defense systems to  
68 regulate TEs (Rebollo *et al.* 2012). However, while experiments and population genetics show that the  
69 average effect of TE insertions is deleterious, individual transposition events may be neutral or even  
70 advantageous (Wilke *et al.* 1992; González and Petrov 2009; Stoebel and Dorman 2010; Van't Hof *et al.*  
71 2016; Hope *et al.* 2017; Li *et al.* 2018; Esnault *et al.* 2019; Niu *et al.* 2019). Far from their historical  
72 status of “junk DNA,” TEs are now known to contribute to a variety of processes including telomere  
73 maintenance (Pardue and DeBaryshe 2011), centromere structure (Casola *et al.* 2008; Carbone *et al.*  
74 2012; Gao *et al.* 2015; Kursel and Malik 2016; Jangam *et al.* 2017), sex chromosome evolution (Bachtrog  
75 2003) (Ellison and Bachtrog 2013; Dechaud *et al.* 2019), regulation of gene expression, evolution of  
76 genome size, karyotype, and genomic organization across the tree of life (Petrov 2002; Jiang *et al.* 2004;  
77 Gregory and Johnston 2008; Pellicer *et al.* 2014; Schubert and Vu 2016; Kapusta *et al.* 2017; Thybert *et*  
78 *al.* 2018; Bourque *et al.* 2018).

79 The type and number of TEs in a genome vary between populations and species, as do the regulatory  
80 systems organisms use to suppress TEs (Bourque *et al.* 2018). In her Nobel prize lecture in 1983, Barbara  
81 McClintock hypothesized that hybridization between different populations or species could act as a  
82 “genomic shock” that initiates TE mobilization that could lead to the formation of new species.

83 “Undoubtedly, new species can arise quite suddenly as the aftermath of accidental hybridizations between  
84 two species belonging to different genera. All evidence suggests that genomic modifications of some type  
85 would accompany formation of such new species. Some modifications may be slight and involve little  
86 more than reassortments of repetitious DNAs, about which we know so little... Major genome restructuring

87 most certainly accompanied formation of some species. Studies of genomes of many different species and  
88 genera indicate this. Appreciation of the various degrees of reassortment of components of a genome, that  
89 appear during and following various types of genome shock, allows degrees of freedom in considering such  
90 origins. It is difficult to resist concluding that some specific “shock” was responsible for the origins of new  
91 species in the two instances to be described below. The organization of chromosomes in many closely  
92 related species may resemble one another at the light microscope level. Only genetic and molecular  
93 analyses would detect those differences in their genomes that could distinguish them as species. In some  
94 instances of this type, distinctions relate to the assortment of repetitious DNAs over the genome, as if a  
95 response to shock had initiated mobilities of these elements(McClintock 1984).”

96 This idea revolves in part around the idea that hybridization could cause a de-repression of TE regulation,  
97 perhaps by mismatch of the repression system in the hybrid genome. Evidence supporting this hypothesis  
98 is mixed. Initial excitement centered on the hybrid dysgenesis system in *Drosophila melanogaster*, where  
99 an intraspecific cross between a strain carrying the P-element transposon to a strain without P-elements  
100 produced sterile offspring (Kidwell *et al.* 1977; Bingham *et al.* 1982; Kidwell 1983; Rose and Doolittle  
101 1983; Bucheton *et al.* 1984). However, attempts to test this model of transposon induced speciation across  
102 other species of *Drosophila* demonstrated this applied in certain crosses but not others (Coyne 1985,  
103 1986, 1989; Hey 1988; Lozovskaya *et al.* 1990; Labrador *et al.* 1999; Kelleher *et al.* 2012). Studies in the  
104 *Arabidopsis* species complex are similarly mixed, with evidence that crosses between *Arabidopsis*  
105 *thaliana* and *Arabidopsis arenosa* lead to an upregulation of the retrotransposon ATHILA, the level of  
106 which is linked to hybrid inviability (Josefsson *et al.* 2006); but crosses between *A. thaliana* and *A. lyrata*  
107 show no change in expression of TEs in interspecific hybrids (Göbel *et al.* 2018). Iconic studies in desert  
108 sunflowers revealed that three independent hybrid species formed by crosses of *Helianthus annuus* and  
109 *Helianthus petiolaris* had elevated copy number of LTR retrotransposons compared to their parent species  
110 (Ungerer *et al.* 2006, 2009; Staton *et al.* 2009). However, contemporary crosses of the same *Helianthus*  
111 parental species did not lead to large scale proliferation of TEs, although the TEs remain transcriptionally  
112 active (Kawakami *et al.* 2011; Ungerer and Kawakami 2013; Renaut *et al.* 2014). From all of these

113 studies, there is evidence that hybridization in some cases can lead to a misregulation of the TE repression  
114 system and potential proliferation of TEs, but it remains unclear how widespread this phenomenon is and  
115 what factors contribute to this process.

116 In this study, we use *Saccharomyces cerevisiae* x *Saccharomyces uvarum* interspecific hybrids as a  
117 system to explore the hypotheses that hybridization can lead to an increase in transposition of TEs, and  
118 that hybridization could provide an avenue for colonization of a naïve genome by TEs. *S. cerevisiae* has  
119 been used as a model to understand retrotransposition for decades. *Saccharomyces* TEs are made up of  
120 Long Terminal Repeat (LTR) retrotransposons which fall into six families, Ty1, Ty2, Ty3, Ty3\_1p, Ty4,  
121 and Ty5 (Kim *et al.* 1998; Carr *et al.* 2012). Ty elements make up a small fraction of the genome (<5%),  
122 with a total of approximately 50 full length Ty elements and over 400 solo LTRs in the *S. cerevisiae*  
123 reference genome (Kim *et al.* 1998; Carr *et al.* 2012). Ty1 is the most abundant and well-studied Ty  
124 element, representing almost 70% of the full length TEs in the reference genome, with its closely related  
125 family Ty2 making up a further 25%. Ty1 preferentially integrates near genes transcribed by RNA  
126 Polymerase III through an association between integrase and Pol III-complexes (Mularoni *et al.* 2012).  
127 The other families are rare; Ty3 is thought to be an active family (Hansen and Sandmeyer 1990), Ty4 has  
128 full length elements but has not been observed to transpose (Hug and Feldmann 1996), and no intact  
129 copies of Ty5 are known (Voytas and Boeke 1992).

130 Ty content and copy number vary across strains and species (Liti *et al.* 2005; Bleykasten-Grosshans *et al.*  
131 2013), with Ty elements inherited vertically and horizontally (Liti *et al.* 2005; Carr *et al.* 2012; Bergman  
132 2018; Czaja *et al.* 2020), and certain Ty families lost. For example, *S. uvarum*, a cold-tolerant species 20  
133 million years divergent from *S. cerevisiae*, has no full length Ty elements with the exception of the Ty4-  
134 like Tsu4 (which likely evolved from the Ty4/Tsu4 superfamily which gave rise to the Ty4 element in the  
135 *S. cerevisiae*/*S. paradoxus* lineage) (Neuvéglise *et al.* 2002; Liti *et al.* 2005; Bergman 2018). While there  
136 are no intact copies of Ty1 elements in *S. uvarum*, there are a number of Ty1 and Ty2 solo LTRs,  
137 indicative of past retrotransposition events (Scannell *et al.* 2011).

138 *Saccharomyces* are particularly interesting because the clade has recently lost RNAi regulation of  
139 transposable elements (Drinnenberg *et al.* 2009). Instead, *S. cerevisiae* Ty1 is regulated through a novel  
140 mechanism, copy number control (CNC) (Garfinkel *et al.* 2003, 2016; Saha *et al.* 2015; Ahn *et al.* 2017).  
141 A truncated form of the Ty-encoded Gag capsid protein (p22) disrupts virus-like particle assembly in a  
142 dose-dependent manner, allowing high levels of retrotransposition when few Ty1 elements are present  
143 and inhibiting transposition as copy number increases (Garfinkel *et al.* 2005; Saha *et al.* 2015). However,  
144 re-introducing the proteins Dicer and Argonaute of *Naumovozyma castellii* to *S. cerevisiae* can restore  
145 RNAi, and are sufficient to silence endogenous Ty retrotransposition (Drinnenberg *et al.* 2009). *S.*  
146 *uvarum* and some strains of its close relative *S. eubayanus* are the only *Saccharomyces* species to still  
147 retain Dicer (Wolfe *et al.* 2015), but how this may contribute to Ty regulation is unclear. CNC is not well  
148 understood for Ty elements besides Ty1, nor is it known how CNC functions in other species of  
149 *Saccharomyces* outside of *S. cerevisiae* and *S. paradoxus* (Moore *et al.* 2004; Czaja *et al.* 2020).  
150 Here, we use Ty-specific sequencing and transposition assays in lab-created interspecific hybrids to  
151 understand how hybridization impacts Ty mobilization. We show that hybridization does not lead to an  
152 increase in transposition rate or proliferation of Ty1 elements in hybrids. However, we do document  
153 variation in transposition rate in hybrids that is mediated through a curious phenomenon of mitochondrial  
154 inheritance, such that hybrids with *S. uvarum* mitochondria have a lower rate of transposition than hybrids  
155 with *S. cerevisiae* mitochondria.

## 156 **Materials & Methods**

### 157 **Strains and plasmids used**

158 Strains YMD119 and YMD120 are haploid *S. cerevisiae* strains of GRF167 background (YMD119, L35 -  
159 102 C1, *ura3-167 MAT $\alpha$* , YMD120, L47-102 C1, *ura3-167 MAT $\alpha$* ). YMD119 is a high-Ty strain created  
160 by repeated induced transposition of Ty1, while YMD120 has a Ty1 profile similar to S288C (Scheifele  
161 *et al.* 2009). These strains were crossed to YMD366, a *S. uvarum* lab strain of background CBS7001, to

162 create hybrids YMD130, and YMD129, respectively. Strains YMD3375 (*his3d200 ura3-167*, Ty1his3AI-  
163 242 (chrXII)) and YMD3376 (*his3d200 ura3-167*, Ty1his3AI-273 (chrII)) carry an integrated, marked  
164 Ty1 element for use in transposition assays (gifts from Mary Bryk, see (Bryk *et al.* 1997)). YMD3375  
165 and YMD3376 were crossed to CSH143 to create *S. cerevisiae* diploids CSH144 and CSH145, and to  
166 CSH189 to create *S. cerevisiae* x *S. uvarum* hybrids (CSH192, 193, 195-198) for transposition assays.  
167 Strains YMD3375 and YMD3376 were provided by Chris Hittinger, and were also crossed to CSH187 to  
168 create hybrids with a *S. uvarum dcr1* knockout for transposition assays. Strains yCSH215 and yCSH216  
169 are  $\rho^0$  versions of YMD3375 and YMD3376, respectively, which were created via passage on ethidium  
170 bromide. The *Ty1his3AI* plasmid was a gift from David Garfinkel, as used in (Curcio and Garfinkel  
171 1991). See **Table S1** for a list of all strains used.

## 172 **Survey of *S. uvarum* Ty elements**

173 We downloaded sequencing reads for 54 *S. uvarum* isolates (Almeida *et al.* 2014) and aligned each  
174 sample with bwa aln (Li and Durbin 2009) to a reference genome made of Ty1, Ty2, Ty3, Ty4, and Ty5  
175 full length elements. We then employed RetroSeq version 1.41 (Keane *et al.* 2013) on a subset of these  
176 samples to call novel insertions in the *S. uvarum* genome. Each call was manually inspected using  
177 Integrative Genomics Viewer (Robinson *et al.* 2011).

## 178 **TySeq library creation and sequencing**

179 DNA was extracted using the Hoffman-Winston protocol (Hoffman and Winston 1987), cleaned using the  
180 Zymo Clean and Concentrate kit (Zymo Research, Irving, CA), and quantified on the Qubit fluorometer.  
181 To identify Ty elements, we took a sequencing based approach modified from previous methods (van  
182 Opijnen *et al.* 2009; Mularoni *et al.* 2012), which we call TySeq. The library preparation was based off of  
183 previously described methods (Wetmore *et al.* 2015; Sanchez *et al.* 2019), modified as described here  
184 (**Figure S1**, see **Supplemental Text** for detailed protocol, **Table S2** for primers). 1  $\mu$ g of genomic DNA  
185 was sheared to an average size of 800 bp using a Covaris machine with default settings. The sheared



186 DNA fragments were blunt ended, and A-tails were added to the fragments to ligate the Illumina adapter  
187 sequences. We used a nested PCR approach, in which we first attempted to amplify full-length Ty1 and  
188 Ty2 elements using custom primers designed to target sequences interior to Ty1 and Ty2 elements,  
189 avoiding the LTR sequences (See **Table S2** for primers used), and custom indexed primers that target the  
190 Illumina adapter sequence were used to enrich for genomic DNA with Ty1 and Ty2 insertion sites. The  
191 second PCR used the product from PCR#1 with the same indexed primer that binds the Illumina adapter,  
192 and a second primer that binds the Ty1 and Ty2 LTR and adds the second Illumina adapter (**Figure S1**).  
193 The resulting libraries were quantified on a Qubit and run on a 6%TBE gel to assess library size. Libraries  
194 were sequenced on an Illumina NextSeq 500 using a custom R1 sequencing primer that binds the Ty1 and  
195 Ty2 LTR. Due to the low complexity of the libraries, libraries were never allowed to exceed 10-15% of a  
196 sequencing run.

197 TySeq of induced transposition with the marked Ty1 was produced as above, except using a primer that  
198 binds to *HIS3* instead of Ty1 (See **Table S2** for primers used). Strain CSH153 was transformed with the  
199 *TyHis3AI* plasmid and crossed to *S. uvarum* strain CSH6 to create strain CSH177. Biological replicates  
200 of CSH177 were grown overnight in C-URA media to maintain the plasmid, then a small number of cells  
201 were used to inoculate 48 replicates of 1 mL C-URA + 2% galactose, which was grown for 2 days at  
202 20°C. Replicates were then pooled together and plated on C-HIS plates. Plates were scraped and pooled  
203 together to be used for DNA library preparation.

#### 204 **TySeq sequencing analysis**

205 Due to the sequencing primer design, Read 1 sequencing reads should start with 27bp of the LTR. We  
206 took a stringent approach to filtering TySeq reads for alignment. First, R1 reads were cropped to 27bp in  
207 length using trimmomatic v0.32 (Bolger *et al.* 2014) and aligned to a Ty element reference genome,  
208 which contained all annotated LTR and Ty elements in the *S. cerevisiae* S288C reference genome  
209 (obtained from SGD, last updated 2015-01-13), using bwa aln (Li and Durbin 2009). Only reads mapping

210 to this Ty reference genome were used in later steps. We subset all 150 bp reads to only reads that  
211 mapped to the Ty reference genome using seqtk subseq (<https://github.com/lh3/seqtk>). These full length  
212 R1 reads then had the first 27 bp cropped using trimmomatic to remove the LTR specific sequence from  
213 the read. A second filtering step was taken to remove all reads mapping to Ty elements using the same  
214 approach as above. Finally, reads not mapping to Ty elements were aligned to the reference genome,  
215 sacCer3 or Sbay.ultrascaf (Scannell *et al.* 2011). Only positions with more than 50 reads were considered  
216 likely insertions. All potential inserts were visually inspected using Integrative Genomics Viewer  
217 (Robinson *et al.* 2011) and we confirmed a subset of the insertions using PCR. Genome coverage in 25 bp  
218 intervals was assessed using igvtools count (Robinson *et al.* 2011). Overlap of Ty elements between  
219 different samples was assessed using bedtools “window,” and proximity to sequence features was  
220 assessed using bedtools “closest” (Quinlan and Hall 2010).

### 221 **Transposition rate assays**

222 Transposition rate was measured in strains with an integrated Ty1 tester *TyIhis3AI* as has been previously  
223 described (Curcio and Garfinkel 1991; Bryk *et al.* 1997; Dunham *et al.* 2015). A strain was grown  
224 overnight, then cell count was assessed by hemacytometer. Approximately 2500 cells were diluted in 10  
225 mL of YPD then inoculated in 100  $\mu$ L volume in a 96 well plate, such that there were less than 500 cells  
226 per well. The plate was sealed with a breathable membrane and incubated without shaking at 20°C for 4  
227 days. All exterior wells were discarded. C-HIS plates were prepared for the assay by drying via blotting  
228 with sterile Watson filter paper or incubation in a 30 incubator for 2 days. Three wells were titered on  
229 YPD plates to assess population size and the remaining wells entire contents were individually,  
230 independently spotted onto very dry C-HIS plates and left to incubate at 30°C for 3 days. Patches were  
231 scored as zero or non-zero. Each assay examined on average 57 patches, with at least two biological  
232 replicates. Transposition rate was scored via a maximum likelihood method (Lea and Coulson 1949).

### 233 **Whole genome sequencing of selected hybrids**

234 Based on results from transposition assays, four strains were selected for whole genome sequencing  
235 (yCSH195, yCSH198, yCSH193, yCSH196). Strains were grown up overnight, and a portion of each was  
236 used to start new transposition assays. The remaining cells had DNA extracted using the Hoffman  
237 Winston protocol followed by library preparation using the Illumina Nextera library kit. The samples  
238 were sequenced on an Illumina NextSeq 500 and reads were aligned to a concatenated reference genome  
239 of *S. cerevisiae* and *S. uvarum* (Scannell *et al.* 2011) using bwa mem and default parameters (Li and  
240 Durbin 2009). Read depth was assessed using igvtools (Robinson *et al.* 2011) and normalized to account  
241 for average genome wide coverage. Read depth per homolog was used as a proxy of copy number change  
242 in the hybrid.

#### 243 **Plate reader assay**

244 We used a BioTek Synergy H1 plate reader to assay growth rate by measuring OD600 every 15 minutes  
245 at 25°C with agitation over the course of 60 hours. 3 replicates of each strain (CSH218, 219, 221, 222,  
246 224, 225, 227, 228) were grown in rich media (YPD), and 3 replicates of each strain were grown in media  
247 with glycerol as the sole carbon source (YPG).

#### 248 **Data availability**

249 Sequencing data are deposited under BioProject ID PRJNA639117.

#### 250 **Results**

##### 251 Nearly all isolates of *S. uvarum* are free of Ty elements

252 Characterization of the CBS7001 lab strain of *S. uvarum* determined that *S. uvarum* was devoid of full  
253 length Ty elements with the exception of Tsu4 (Bon *et al.* 2000; Neuvégilise *et al.* 2002; Liti *et al.* 2005;  
254 Scannell *et al.* 2011). We conducted a bioinformatics based survey of 54 worldwide isolates from natural  
255 and fermentation conditions (Almeida *et al.* 2014) to identify if the characterization of CBS7001 was  
256 representative of the species as a whole. We largely confirm *S. uvarum* to be missing full length Ty

257 elements, but find a single strain (GM14) with a potential full length Ty1 element. This strain was  
258 isolated from grape must in France and has introgression derived from *S. eubayanus*, *S. kudriavzevii*, and  
259 *S. cerevisiae*, although the potential insertion is not in one of these regions. Given the strain's history of  
260 hybridization, we sought to identify if hybridization could provide a possible mechanism for Ty elements  
261 to insert in naïve species' genomes.

#### 262 TySeq, a sequencing method for detecting *de novo* transposable element insertions

263 Detecting TEs in sequencing data is notoriously difficult. Their repetitive nature and large size (for  
264 example, the Ty1 is approximately 6kb) present major challenges to genome assembly, and traditional  
265 alignment pipelines will miss new insertions due to their absence in the reference genome. There have  
266 been many advances in the computational detection of TEs using short read sequencing data (Ewing  
267 2015; Rishishwar *et al.* 2017), and long-read sequencing will likely represent the new gold standard for  
268 TE annotation (Disdero and Filée 2017; Bergman 2018; Kutter *et al.* 2018; Shahid and Slotkin 2020).  
269 However, there is still a wide range of false positives and false negatives associated with computational  
270 methods, and long-read sequencing is currently more expensive and less high-throughput than short read  
271 methods. We therefore present a method, TySeq, adapted from previous methods (van Opijnen *et al.*  
272 2009; Mularoni *et al.* 2012), which can identify novel or non-reference Ty1 element insertions. While we  
273 apply this to Ty1 and Ty2 elements in *Saccharomyces* specifically, it is easily adapted to support the  
274 detection of other TEs in other organisms.

275 Briefly, we created a sequencing library quite similar to traditional whole genome sequencing library  
276 methods with small modifications (**Figure S1**). We started with a sheared genomic library of 800bp, large  
277 enough to span the LTR region of Ty elements and capture flanking genomic sequence. We created a  
278 biased library by using primers that amplify DNA fragments which contain a full length Ty1 or Ty2  
279 element. We then used a custom sequencing primer that sequences off the LTR, capturing the flanking

280 genomic region. These reads can be mapped back to a reference genome, thus identifying locations of  
281 new, non-reference, and reference TE insertions.

282 We applied TySeq to *S. cerevisiae* x *S. uvarum* hybrid strains to demonstrate proof of principle (**Figure 1,**  
283 **Figures S2-S4**). We identified 52 putative Ty1 and Ty2 elements (read depth of 50+ reads supporting,  
284 **Table S3**) in the *S. cerevisiae* sub-genome of a wild-type hybrid strain. While the strain background  
285 differs from the *S. cerevisiae* reference genome, we find a similar number of Ty1 and Ty2 elements  
286 present. We additionally utilized a “high-Ty” hybrid, in which the *S. cerevisiae* portion of the genome  
287 carries a higher load of Ty1 elements derived from repeated induction of transposition using a synthetic  
288 construct (Scheifele *et al.* 2009). We identified 71 putative Ty1 and Ty2 elements (read depth of 50+  
289 reads supporting, **Table S3**) in the *S. cerevisiae* sub-genome of this high-Ty hybrid. We then created a  
290 synthetic mixed population (90% wild-type hybrid, 10% high-Ty hybrid) to test the sensitivity of our  
291 TySeq protocol in detecting low frequency Ty insertions. We detected 87 Ty1 and Ty2 elements in the  
292 synthetic mixed sample, largely recapitulating Ty elements derived from both the wild-type hybrid (49/52  
293 elements detected at a read depth of 50+ reads) and high-Ty hybrid (69/72 elements detected at read depth  
294 of 50+ reads), indicating we can detect most Ty elements which are only present in 10% of a population.  
295 The overall false positive rate (detected in the mixed sample but not in either wild-type nor high-Ty  
296 strain) is 8/87 (or 9.20%) and the false negative rate is 5/87 (5.75%, present in wild-type and/or high-Ty  
297 strain but not in mixed sample). The majority of both false positive and false negative detected insertions  
298 are the result of presence of an element with 50 or more reads in one sample, with reads between 1-49  
299 read depth in the other sample(s) (**Table S3**). We did not identify Ty1 or Ty2 elements in the *S. uvarum*  
300 sub-genome of these hybrid strains, consistent with the previously identified absence of full length Ty1 or  
301 Ty2 elements in *S. uvarum* (**Figure 1, Figures S2-S4**). This furthermore suggests that new insertions do  
302 not occur in the outgrowth of the colony from a single hybrid zygote.

303 We next sought to identify if we could induce transposition and detect novel insertions in a hybrid  
304 genome, and in particular, if insertions would occur in the *S. uvarum* sub-genome. We used a marked Ty1

305 element, *TyIhis3AI* on a plasmid under galactose induced expression (Curcio and Garfinkel 1991). This  
306 construct has a full length Ty1 element with a *HIS3* reporter gene interrupted with an artificial intron.  
307 Upon transposition, the intron is spliced out, restoring functionality to *HIS3* and allowing detection of  
308 transposition events by growth on media lacking histidine (**Figure S5**). We sequenced two replicates of a  
309 pool of His<sup>+</sup> colonies and detected 23,693 and 31,083 reads mapping to the *S. cerevisiae* sub-genome,  
310 and 33,427 and 45,272 reads mapping to the *S. uvarum* sub-genome. We identified 93 and 122 insertions  
311 in the *S. cerevisiae* sub-genome respectively (with 50+ reads, **Table S4, Figure 1, Figures S6, S7**), with  
312 many of these sites differing from those identified in the wild-type and high-Ty hybrid. A similar number  
313 of insertions were identified in the *S. uvarum* sub-genome, with 121 and 109 insertions detected  
314 respectively (**Figure 1, Figures S6, S7, Table S5**). These results suggest that Ty1 is equally likely to  
315 insert into either *S. cerevisiae* or *S. uvarum* genomes.

316 In *S. cerevisiae*, Ty1 elements preferentially insert near PolIII transcribed genes, like tRNAs (Mularoni *et al.*  
317 *al.* 2012). Here, we show that in the two replicates, 83.68% and 88.55% of reads that map to the *S.*  
318 *uvarum* genome are within 2kb of an annotated tRNA gene. This is similar to the 93.6% reported for *S.*  
319 *cerevisiae* (Mularoni *et al.* 2012), suggesting the insertion preference for Ty1 is conserved despite 20  
320 million years divergence between the two species. The discrepancy between *S. cerevisiae* and *S. uvarum*  
321 might be due in part to differences in annotation between the two species reference genomes (there are  
322 fewer tRNA genes annotated in the *S. uvarum* reference). Our results thus show that Ty1 elements can  
323 insert in the *S. uvarum* genome, and suggest that hybridization may be a mechanism through which  
324 transposable elements could hop from one species to another.

### 325 Variable transposition rate in hybrids

326 We then directly measured transposition rate in *S. cerevisiae* x *S. uvarum* hybrids to test the hypothesis  
327 that transposition is increased in interspecific hybrids. We used *S. cerevisiae* strains which have a marked  
328 Ty1 element, *TyIhis3AI*, integrated on chrII and chrXII, respectively (**Table S1, Figure S5**). These

329 marked *S. cerevisiae* strains were crossed to an unmarked *S. cerevisiae* strain to create diploids, and to an  
330 unmarked *S. uvarum* strain to make hybrids. Transposition rate was scored via the fluctuation method  
331 (Lea and Coulson 1949).

332 Transposition rate is dependent on the location of the marked Ty1 element, and can depend upon ploidy,  
333 where diploids may have a lower rate of transposition compared to haploids due to MATa/*a* repression  
334 (Elder *et al.* 1981; Herskowitz 1988; Garfinkel *et al.* 2005). We first repeated transposition assays in  
335 marked *S. cerevisiae* haploids and recapitulate previously published results, that *S. cerevisiae* haploid  
336 *Ty1his3AI* strains have transposition rates of  $10^{-6}$  to  $10^{-7}$  per generation (Curcio and Garfinkel 1991, 1992;  
337 Bryk *et al.* 1997). We furthermore recapitulate results of similar haploid and diploid rates (**Table 1**)  
338 (Garfinkel *et al.* 2005 p. 1).

339 We tested the hypothesis that the maintenance of one of the RNAi genes, Dicer (*DCRI*), in *S. uvarum*  
340 may be responsible for the absence of most Ty elements in that species. *DCRI* is absent in *S. cerevisiae*,  
341 so hybrids would normally have only the single *S. uvarum* copy of *DCRI*. We created a hybrid with a *S.*  
342 *uvarum dcr1* knockout. If *DCRI* mediates transposition rate, we would expect that *dcr1* hybrids would  
343 have an increased transposition rate. Instead, we found the rate in these hybrids to be  $5.44 \times 10^{-8}$  (+/-  $5.26$   
344  $\times 10^{-9}$ ), similar to the rate observed in hybrids with an intact copy of *S. uvarum DCRI* (**Table 1**).

345 We tested transposition rate in 7 independent hybrid crosses (**Table 1**). We clearly show that  
346 hybridization does not increase transposition rate, with the highest rate of transposition observed in  
347 hybrids at approximately  $1.05 \times 10^{-7}$  (+/-  $4.60 \times 10^{-9}$ ), similar to rates in haploid *S. cerevisiae*, ranging to  
348 undetectably low levels of transposition (scored as a rate of 0). This variation in transposition rate  
349 between hybrids is significant (p=0.0049, ANOVA). Hybrids should be isogenic within a cross, and  
350 between crosses should only be differentiated by the marked Ty1 element residing on chrII or chrXII.  
351 Differences in transposition rate between independent hybrid matings could result from copy number  
352 variation resulting from genomic instability following hybridization, a point mutation or



353 insertion/deletion that occurred during the growup of the culture for the transposition assay, or differential  
354 mitochondrial inheritance.

355 To identify the causal variants contributing to transposition rate variation in these hybrids, we selected  
356 strains that exhibited a low transposition rate (yCSH195, yCSH198), and strains with a diploid-like  
357 transposition rate (yCSH193, yCSH196) for whole genome sequencing. We identified a loss of the *S.*  
358 *cerevisiae* copy of chrXII in yCSH195, which resulted in the loss of the marked Ty1, hence the observed  
359 rate of 0 (**Figure S8**). We did not identify any other copy number variants, point mutations, or  
360 insertion/deletions in the remaining strains; however, we observed that the other hybrid with low  
361 transposition rate (yCSH198) inherited the *S. uvarum* mitochondrial genome (mtDNA), while the other  
362 strains (yCSH193, yCSH196) inherited the *S. cerevisiae* mtDNA. mtDNA is inherited from one parent  
363 (uniparental inheritance) in almost all sexual eukaryotes (Birky 1995, 2001), including the  
364 *Saccharomyces* yeasts. Previous work has observed a transmission bias in *S. cerevisiae* x *S. uvarum*  
365 hybrids, which typically inherit the *S. cerevisiae* mtDNA, although there are a variety of genetic and  
366 environmental factors that contribute to mtDNA inheritance such as temperature and carbon source  
367 (Marinoni *et al.* 1999; Lee *et al.* 2008; Hsu and Chou 2017; Hewitt *et al.* 2020). Mitotype can affect a  
368 number of phenotypes, such as temperature tolerance in yeast hybrids (Baker *et al.* 2019; Li *et al.* 2019;  
369 Hewitt *et al.* 2020), but to our knowledge has not been previously implicated in transposition.

#### 370 *S. uvarum* mtDNA decreases transposition rate in *S. cerevisiae* x *S. uvarum* hybrids

371 We set out to test the hypothesis that mitotype can influence transposition rate in hybrids by creating a set  
372 of crosses with controlled mtDNA inheritance. We induced strains of *S. cerevisiae* and *S. uvarum* to lose  
373 their mtDNA (denoted as  $\rho^0$ ) through passage on ethidium bromide, then crossed these  $\rho^0$  strains to the  
374 corresponding species with mtDNA intact. We conducted transposition assays in these newly created  
375 hybrids and demonstrate that the inheritance of *S. uvarum* mtDNA results in a significantly lower  
376 transposition rate ( $p=0.0039$ , Welch's t-test; **Table 2**). A series of growth curves on fermentable and non-



377 fermentable carbon sources illustrates that *S. uvarum* mtDNA is still functioning in respiration, although  
378 results in a slightly slower growth rate than the identical strain with *S. cerevisiae* mtDNA (**Figure S9**).

## 379 **Discussion**

380 In summary, we combined a modified sequencing strategy, TySeq, with *in vivo* transposition rate assays  
381 to test the hypothesis that TE mobilization may be increased in interspecific hybrids. Using an integrated,  
382 marked Ty element construct to quantify transposition rate, we identified significant variation in  
383 transposition rate among strains that we expected to be isogenic. We show that mitochondrial inheritance  
384 can explain this variation, with *S. uvarum* mtDNA decreasing transposition rate in hybrids by an order of  
385 magnitude. Thus, while we reject the hypothesis that hybridization increases TE mobilization, we  
386 demonstrate hybridization can impact transposition rate in novel ways.

### 387 Intrinsic and extrinsic variables that affect transposable element movement

388 There is considerable variation in TE content across species and between populations, and many extrinsic  
389 and intrinsic factors that mediate transposition rate. Both the rate and distribution of TEs are governed by  
390 their overall deleterious effect (Charlesworth and Langley 1989). All organisms have evolved defenses to  
391 limit TE movement, although these systems vary across species and include zinc-finger proteins, small  
392 RNA-based silencing strategies, DNA methylation, and chromatin modifications (Rebollo *et al.* 2012).  
393 TE elements and their host defense systems continue to evolve, which in turn changes transposition rate.  
394 For example, Kofler *et al.* utilized experimental evolution to observe the evolution of a P-element  
395 invasion in populations of naïve *D. simulans*, documenting the emergence over time of P-element specific  
396 piRNAs that curbed the spread of the P-element (Kofler *et al.* 2018). In *S. cerevisiae* and *S. paradoxus*,  
397 recent work discovered two variants of the Ty1 element segregating in populations of wild and human-  
398 associated strains that determine rates of Ty mobility (Czaja *et al.* 2020). Strains with the canonical Ty1  
399 element show reduced mobility of canonical Ty1 whereas strains with the divergent Ty1' (and lack of

400 genomic canonical Ty1) show increased mobility of canonical Ty1. This is a result of the TE defense  
401 system (CNC) being Ty specific, such that Ty1' CNC cannot control the mobility of Ty1.

402 Here, we find that mitochondrial inheritance in hybrids significantly changes transposition rate, the first  
403 study to document this connection. A mechanism of how mtDNA is influencing transposition is unclear,  
404 although mitochondria function in a huge variety of processes beyond generating cellular energy (Malina  
405 *et al.* 2018; Dujon 2020; Hose *et al.* 2020). The unique pattern of mtDNA inheritance and large numbers  
406 of nuclear-encoded mitochondrial genes contribute to mito-nuclear incompatibilities that underlie some  
407 speciation events (Lee *et al.* 2008; Gershoni *et al.* 2009; Chou and Leu 2010; Burton and Barreto 2012;  
408 Crespi and Nosil 2013) and human diseases (Duchen and Szabadkai 2010; Vafai and Mootha 2012).  
409 Moreover, species specific inheritance of mtDNA in hybrids results in a strong environmentally  
410 dependent allele preference for one species' alleles or the other (Hewitt *et al.* 2020). Perhaps this species  
411 specific allele expression results in the suppression of *S. cerevisiae* encoded Ty elements in a hybrid with  
412 *S. uvarum* mtDNA, causing the observed lower rates of transposition.

413 Temperature also seems to play a mediating role in mitochondrial inheritance, mitochondria function, and  
414 transposable element movement. Mitochondria have been repeatedly implicated in adaptation to different  
415 temperatures (e.g., the "mitochondrial climatic adaptation hypothesis") (Mishmar *et al.* 2003; Ruiz-Pesini  
416 *et al.* 2004; Ballard and Whitlock 2004; Wallace 2007; Dowling 2014; Camus *et al.* 2017). For example,  
417 in hybrids between thermotolerant *S. cerevisiae* and cryotolerant *S. uvarum* or *S. eubayanus*, *S. cerevisiae*  
418 mtDNA confers growth at high temperatures, while *S. uvarum* or *S. eubayanus* mtDNA confers growth at  
419 low temperatures (Baker *et al.* 2019; Li *et al.* 2019; Hewitt *et al.* 2020). An Australian cline of *D.*  
420 *melanogaster* showed thermal performance associated with each mitotype corresponds with its latitudinal  
421 prevalence (Camus *et al.* 2017). Intriguingly, TEs were shown to play a significant role in adaptation to  
422 the climatic variables in this same *D. melanogaster* cline (González *et al.* 2008, 2010). Recently Kofler *et*  
423 *al.* used experimental evolution of *D. simulans* at cold and warm temperatures and showed that  
424 temperature drastically impacts the rate at which a TE can spread in a population (Kofler *et al.* 2018). In

425 *S. cerevisiae*, rates are estimated to be 100 fold higher at temperatures 15-20°C than at the normal lab  
426 conditions of 30°C (Paquin and Williamson 1984; Garfinkel *et al.* 2005). All transposition assays were  
427 conducted at the standard 20°C in this study, but future work could explore how temperature impacts  
428 transposition rate in non *S. cerevisiae* species, particularly the cold tolerant *S. uvarum* and *S. eubayanus*.  
429 If transposition rate is increased at cold temperatures, reduced transposition rate may be an evolutionary  
430 response to curb TE mobilization in cryotolerant species. This is certainly an intriguing area for further  
431 study.

#### 432 The role of transposable elements in evolution

433 In recent years we have witnessed a shift from viewing TEs as solely parasitic genetic elements, to  
434 appreciating the myriad ways in which TEs impact eukaryotic evolution. In our own work in laboratory  
435 evolution experiments, we have shown that Ty elements are often breakpoints for adaptive copy number  
436 variants and that insertions can cause adaptive gain and loss of function mutations. Intriguingly, we have  
437 previously observed fewer copy number variants in *S. uvarum* than *S. cerevisiae* evolved populations,  
438 perhaps related to their paucity of repetitive elements to facilitate such mutational events (Smukowski  
439 Heil *et al.* 2017, 2019). Copy number events, and in particular chromosome rearrangements can cause  
440 inviability between crosses (e.g., chromosomal speciation), which may represent more relevant paths in  
441 which TEs may impact speciation. While the evidence that TE mobilization in hybrids can facilitate  
442 speciation is limited, there remains much to be explored regarding evolution of host-TE dynamics  
443 between closely related species.

444

#### 445 **Acknowledgements**

446 Thanks to Marcus Annable for help in shearing TySeq libraries. Thanks to Mary Bryk and Chris Hittinger  
447 for sharing strains, and David Garfinkel for sharing the Ty1his3AI plasmid. This work was supported by  
448 the National Science Foundation (grant number 1516330 to MJD). CSH was supported in part by the

449 NIH/NHGRI Genome Training Grant T32 HG00035. During this work, MJD was a Senior Fellow in the  
450 Genetic Networks program at the Canadian Institute for Advanced Research and a Rita Allen Foundation  
451 Scholar. MJD is supported in part by a Faculty Scholars grant from the Howard Hughes Medical Institute.

452

## 453 **Figure Legend**

454 **Figure 1: Using TySeq to identify Ty elements in *S. cerevisiae* x *S. uvarum* hybrids.** Ty elements  
455 detected with TySeq are shown as black lines across chrVII for the *S. cerevisiae* (pink) and *S. uvarum*  
456 (blue) portions of a hybrid genome. Ty elements are shown for wild type (YMD129), high-Ty  
457 (YMD130), a mixed sample of 90% YMD129 and 10% YMD130, and a pool of His<sup>+</sup> colonies obtained  
458 from induced transposition. No Ty elements were detected in the *S. uvarum* portion of the hybrid genome  
459 except when transposition was artificially induced (these insertions are plotted using *S. uvarum* genome  
460 coordinates). For whole genome figures, see **Figures S2-S4,S6-S7**. For coordinates of insertions, see  
461 **Tables S3-S5**.

## 462 **Supplementary Figure legends**

463 **Figure S1: TySeq, a modified sequencing method for detecting novel transposition events. A.** A Ty1  
464 element is a long terminal repeat (LTR) retrotransposon. It is flanked by directional repeats (light blue).  
465 **B.** Genomic DNA is sheared into ~800 bp fragments. **C.** Illumina Nextera adapters are ligated on to the  
466 fragment ends (green). **D.** First round PCR is completed using a Ty1/Ty2 specific forward primer and a  
467 reverse primer that binds to the Nextera adapter and has a unique index (purple) and the flow cell (red). **E.**  
468 A second round of PCR is done on the Ty1 and Ty2 enriched library using the same reverse primer and a  
469 forward primer that binds to the LTR immediately adjacent to genomic sequence. **F.** A unique R1  
470 sequencing primer is added to the sequencing run. **G.** Reads are mapped back to the reference genome,  
471 identifying sites of likely transposable element insertions.

472 **Figure S2: Ty elements detected with TySeq in wild type hybrid strain YMD129.** Chromosomes are  
473 shown in order from the top, chrI-chrXVI, with *S. cerevisiae* chromosomes in pink and *S. uvarum*  
474 chromosomes in blue. *S. cerevisiae* genomic coordinates are used for *S. cerevisiae* chromosomes and *S.*  
475 *uvarum* genomic coordinates are used for *S. uvarum* chromosomes. Black lines indicate a Ty element  
476 detected with a read depth of at least 50 reads. No Ty elements were detected in the *S. uvarum* portion of  
477 the hybrid genome. See **Table S3** for Ty element coordinates and maximum read depth.

478 **Figure S3: Ty elements detected with TySeq in the high-Ty hybrid strain YMD130.** Chromosomes  
479 are shown in order from the top, chrI-chrXVI, with *S. cerevisiae* chromosomes in pink and *S. uvarum*  
480 chromosomes in blue. *S. cerevisiae* genomic coordinates are used for *S. cerevisiae* chromosomes and *S.*  
481 *uvarum* genomic coordinates are used for *S. uvarum* chromosomes. Black lines indicate a Ty element  
482 detected with a read depth of at least 50 reads. No Ty elements were detected in the *S. uvarum* portion of  
483 the hybrid genome. See **Table S3** for Ty element coordinates and maximum read depth.

484 **Figure S4: Ty elements detected with TySeq in a mixed sample of hybrid strains YMD130 (10%)**  
485 **and YMD129 (90%).** Chromosomes are shown in order from the top, chrI-chrXVI, with *S. cerevisiae*  
486 chromosomes in pink and *S. uvarum* chromosomes in blue. *S. cerevisiae* genomic coordinates are used for  
487 *S. cerevisiae* chromosomes and *S. uvarum* genomic coordinates are used for *S. uvarum* chromosomes.  
488 Black lines indicate a Ty element detected with a read depth of at least 50 reads. No Ty elements were  
489 detected in the *S. uvarum* portion of the hybrid genome. See **Table S3** for Ty element coordinates and  
490 maximum read depth.

491 **Figure S5: Transposition assay with a marked Ty1. A.** A full length Ty1 element with a *HIS3* reporter  
492 gene. The *HIS3* gene is interrupted with an artificial intron, and the strain cannot grow on media lacking  
493 histidine. **B.** When the Ty1 element is transcribed, the intron is spliced out, restoring the function of the  
494 *HIS3* gene, **C.** which can be detected by growth on media lacking histidine (**D.**). Independent cultures

495 with a marked Ty1 element are grown independently and then plated on media lacking histidine. Any  
496 colonies indicate transposition has occurred. Figure adapted from (Curcio and Garfinkel 1991).

497 **Figure S6: Ty elements detected with TySeq from induced transposition in a hybrid, replicate 1.**

498 Chromosomes are shown in order from the top, chrI-chrXVI, with *S. cerevisiae* chromosomes in pink and  
499 *S. uvarum* chromosomes in blue. *S. cerevisiae* genomic coordinates are used for *S. cerevisiae*  
500 chromosomes and *S. uvarum* genomic coordinates are used for *S. uvarum* chromosomes. Black lines  
501 indicate a Ty element detected with a read depth of at least 50 reads. See **Table S4** and **S5** for Ty element  
502 coordinates and maximum read depth.

503 **Figure S7: Ty elements detected with TySeq from induced transposition in a hybrid, replicate 2.**

504 Chromosomes are shown in order from the top, chrI-chrXVI, with *S. cerevisiae* chromosomes in pink and  
505 *S. uvarum* chromosomes in blue. *S. cerevisiae* genomic coordinates are used for *S. cerevisiae*  
506 chromosomes and *S. uvarum* genomic coordinates are used for *S. uvarum* chromosomes. Black lines  
507 indicate a Ty element detected with a read depth of at least 50 reads. See **Table S4** and **S5** for Ty element  
508 coordinates and maximum read depth.

509 **Figure S8: A copy number plot of two hybrid genomes.** The top panel is yCSH193, which has a

510 diploid-like transposition rate and no copy number changes. The bottom panel is yCSH195 and lost the *S.*  
511 *cerevisiae* portion of chrXII which contained the marked Ty1 element, resulting in an undetectably low  
512 transposition rate. Purple denotes a region where both alleles are present at a single copy, blue denotes a  
513 *S. uvarum* change in copy number, red denotes a *S. cerevisiae* change in copy number. Note, copy number  
514 was derived from sequencing read depth at homologous ORFs.

515 **Figure S9: Growth curves of hybrids with *S. cerevisiae* mtDNA (strains CSH224, CSH225, CSH227,**

516 **CSH228; red) or *S. uvarum* mtDNA (CSH218, CSH219, CSH221, CSH222; blue) over 24 hours. Each**  
517 **strain was grown in 3 replicates per condition and averaged. Straight lines are growth in rich medium**

518 (YPD), dotted lines are growth in a non-fermentable carbon source, glycerol (YPG). Error bars reflect  
519 standard error.

520

521

522

523

524

525

526

527

528

529

530

531 **Table 1: Variable transposition rate across hybrids**

532

533

| Strain Number | Ploidy, species              | Location of marked Ty | Transposition rate <sup>a</sup><br>(standard error, replicate trials) |
|---------------|------------------------------|-----------------------|-----------------------------------------------------------------------|
| CSH141        | Haploid <i>S. cerevisiae</i> | chrXII                | 1.6x10 <sup>-7</sup> (Bryk <i>et al</i> 1997)                         |
| CSH142        | Haploid <i>S. cerevisiae</i> | chrII                 | 1.5x10 <sup>-7</sup> (Bryk <i>et al</i> 1997)                         |
| CSH144        | Diploid <i>S. cerevisiae</i> | chrXII                | 1.48x10 <sup>-7</sup> (NA, 1)                                         |
| CSH145        | Diploid <i>S. cerevisiae</i> | chrII                 | 7.91x10 <sup>-8</sup> (3.76x10 <sup>-8</sup> , 2)                     |
| CSH192        | Diploid hybrid               | chrXII                | 1.05x10 <sup>-7</sup> (4.60x10 <sup>-8</sup> , 3)                     |
| CSH194        | Diploid hybrid               | chrII                 | 4.22x10 <sup>-8</sup> (6.30x10 <sup>-9</sup> , 2)                     |
| CSH195        | Diploid hybrid               | chrXII                | 0 (0, 2)                                                              |
| CSH196        | Diploid hybrid               | chrXII                | 5.08x10 <sup>-8</sup> (1.45x10 <sup>-8</sup> , 2)                     |
| CSH193        | Diploid hybrid               | chrII                 | 5.68x10 <sup>-8</sup> (3.17x10 <sup>-8</sup> , 2)                     |
| CSH197        | Diploid hybrid               | chrII                 | 4.53x10 <sup>-8</sup> (1.38x10 <sup>-8</sup> , 3)                     |
| CSH198        | Diploid hybrid               | chrII                 | 5.73x10 <sup>-9</sup> (1.12x10 <sup>-9</sup> , 2)                     |

543

544 <sup>a</sup>The rate of His<sup>+</sup> prototroph formation per cell per generation, as determined by the maximum likelihood method of  
545 Lea and Coulson (Lea and Coulson 1949)

546

547

548

549

550

551

552

553

554

555

556

557

558



559 **Table 2: *S.uvarum* mtDNA decreases hybrid transposition rate by an order of magnitude**

560

| Strain Number | Ploidy, species | mtDNA                | Transposition rate <sup>a</sup> (standard error, replicate trials) |
|---------------|-----------------|----------------------|--------------------------------------------------------------------|
| CSH218        | Diploid hybrid  | <i>S. uvarum</i>     | 0 (0,2)                                                            |
| CSH221        | Diploid hybrid  | <i>S. uvarum</i>     | 5.28x10 <sup>-9</sup> (1.09x10 <sup>-9</sup> , 3)                  |
| CSH224        | Diploid hybrid  | <i>S. cerevisiae</i> | 6.51x10 <sup>-8</sup> (1.44x10 <sup>-8</sup> , 3)                  |
| CSH225        | Diploid hybrid  | <i>S. cerevisiae</i> | 3.97x10 <sup>-8</sup> (1.09x10 <sup>-8</sup> , 3)                  |

563

564 <sup>a</sup>The rate of His+ prototroph formation per cell per generation, as determined by the maximum likelihood method of  
565 Lea and Coulson (Lea and Coulson 1949)

566

567

568

569

570

571

572

573

574

575

576

577

578

579 **Literature Cited**

- 580 Ahn H. W., J. M. Tucker, J. A. Arribere, and D. J. Garfinkel, 2017 Ribosome Biogenesis Modulates Ty1  
581 Copy Number Control in *Saccharomyces cerevisiae*. *Genetics* 207: 1441–1456.  
582 <https://doi.org/10.1534/genetics.117.300388>
- 583 Almeida P., C. Gonçalves, S. Teixeira, D. Libkind, M. Bontrager, *et al.*, 2014 A Gondwanan imprint on  
584 global diversity and domestication of wine and cider yeast *Saccharomyces uvarum*. *Nat.*  
585 *Commun.* 5: 4044. <https://doi.org/10.1038/ncomms5044>
- 586 Bachtrog D., 2003 Accumulation of Spock and Worf, Two Novel Non-LTR Retrotransposons, on the  
587 Neo-Y Chromosome of *Drosophila miranda*. *Mol. Biol. Evol.* 20: 173–181.  
588 <https://doi.org/10.1093/molbev/msg035>
- 589 Baker E. P., D. Peris, R. V. Moriarty, X. C. Li, J. C. Fay, *et al.*, 2019 Mitochondrial DNA and  
590 temperature tolerance in lager yeasts. *Sci. Adv.* 5: eaav1869.  
591 <https://doi.org/10.1126/sciadv.aav1869>
- 592 Ballard J. W. O., and M. C. Whitlock, 2004 The incomplete natural history of mitochondria. *Mol. Ecol.*  
593 13: 729–744. <https://doi.org/10.1046/j.1365-294x.2003.02063.x>
- 594 Bergman C. M., 2018 Horizontal transfer and proliferation of Tsu4 in *Saccharomyces paradoxus*. *Mob.*  
595 *DNA* 9: 18. <https://doi.org/10.1186/s13100-018-0122-7>
- 596 Bingham P. M., M. G. Kidwell, and G. M. Rubin, 1982 The molecular basis of P-M hybrid dysgenesis:  
597 the role of the P element, a P-strain-specific transposon family. *Cell* 29: 995–1004.  
598 [https://doi.org/10.1016/0092-8674\(82\)90463-9](https://doi.org/10.1016/0092-8674(82)90463-9)
- 599 Birky C. W., 1995 Uniparental inheritance of mitochondrial and chloroplast genes: mechanisms and  
600 evolution. *Proc. Natl. Acad. Sci. U. S. A.* 92: 11331–11338.

- 601 Birky C. W., 2001 The inheritance of genes in mitochondria and chloroplasts: laws, mechanisms, and  
602 models. *Annu. Rev. Genet.* 35: 125–148.  
603 <https://doi.org/10.1146/annurev.genet.35.102401.090231>
- 604 Bleykasten-Grosshans C., A. Friedrich, and J. Schacherer, 2013 Genome-wide analysis of intraspecific  
605 transposon diversity in yeast. *BMC Genomics* 14: 399. <https://doi.org/10.1186/1471-2164-14-399>
- 606 Bolger A. M., M. Lohse, and B. Usadel, 2014 Trimmomatic: a flexible trimmer for Illumina sequence  
607 data. *Bioinformatics* 30: 2114–2120. <https://doi.org/10.1093/bioinformatics/btu170>
- 608 Bon E., C. Neuvéglise, S. Casaregola, F. Artiguenave, P. Wincker, *et al.*, 2000 Genomic Exploration of  
609 the Hemiascomycetous Yeasts: 5. *Saccharomyces bayanus* var. *uvarum*. *FEBS Lett.* 487: 37–41.  
610 [https://doi.org/10.1016/S0014-5793\(00\)02276-6](https://doi.org/10.1016/S0014-5793(00)02276-6)
- 611 Bourque G., K. H. Burns, M. Gehring, V. Gorbunova, A. Seluanov, *et al.*, 2018 Ten things you should  
612 know about transposable elements. *Genome Biol.* 19: 199. [https://doi.org/10.1186/s13059-018-](https://doi.org/10.1186/s13059-018-1577-z)  
613 [1577-z](https://doi.org/10.1186/s13059-018-1577-z)
- 614 Bryk M., M. Banerjee, M. Murphy, K. E. Knudsen, D. J. Garfinkel, *et al.*, 1997 Transcriptional silencing  
615 of Ty1 elements in the RDN1 locus of yeast. *Genes Dev.* 11: 255–269.  
616 <https://doi.org/10.1101/gad.11.2.255>
- 617 Bucheton A., R. Paro, H. M. Sang, A. Pelisson, and D. J. Finnegan, 1984 The molecular basis of I-R  
618 hybrid dysgenesis in *Drosophila melanogaster*: identification, cloning, and properties of the I  
619 factor. *Cell* 38: 153–163. [https://doi.org/10.1016/0092-8674\(84\)90536-1](https://doi.org/10.1016/0092-8674(84)90536-1)
- 620 Burton R. S., and F. S. Barreto, 2012 A disproportionate role for mtDNA in Dobzhansky-Muller  
621 incompatibilities? *Mol. Ecol.* 21: 4942–4957. <https://doi.org/10.1111/mec.12006>

- 622 Camus M. F., J. N. Wolff, C. M. Sgrò, and D. K. Dowling, 2017 Experimental Support That Natural  
623 Selection Has Shaped the Latitudinal Distribution of Mitochondrial Haplotypes in Australian  
624 *Drosophila melanogaster*. *Mol. Biol. Evol.* 34: 2600–2612.  
625 <https://doi.org/10.1093/molbev/msx184>
- 626 Carbone L., R. A. Harris, A. R. Mootnick, A. Milosavljevic, D. I. K. Martin, *et al.*, 2012 Centromere  
627 Remodeling in *Hoolock leuconedys* (Hylobatidae) by a New Transposable Element Unique to the  
628 Gibbons. *Genome Biol. Evol.* 4: 648–658. <https://doi.org/10.1093/gbe/evs048>
- 629 Carr M., D. Bensasson, and C. M. Bergman, 2012 Evolutionary Genomics of Transposable Elements in  
630 *Saccharomyces cerevisiae*. *PLOS ONE* 7: e50978. <https://doi.org/10.1371/journal.pone.0050978>
- 631 Casola C., D. Hucks, and C. Feschotte, 2008 Convergent domestication of pogo-like transposases into  
632 centromere-binding proteins in fission yeast and mammals. *Mol. Biol. Evol.* 25: 29–41.  
633 <https://doi.org/10.1093/molbev/msm221>
- 634 Charlesworth B., and C. H. Langley, 1989 The Population Genetics of *Drosophila* Transposable  
635 Elements. *Annu. Rev. Genet.* 23: 251–287. <https://doi.org/10.1146/annurev.ge.23.120189.001343>
- 636 Chou J.-Y., and J.-Y. Leu, 2010 Speciation through cytonuclear incompatibility: Insights from yeast and  
637 implications for higher eukaryotes. *BioEssays* 32: 401–411.  
638 <https://doi.org/10.1002/bies.200900162>
- 639 Coyne J. A., 1985 Genetic studies of three sibling species of *Drosophila* with relationship to theories of  
640 speciation. *Genet. Res.* 46: 169–192. <https://doi.org/10.1017/S0016672300022643>
- 641 Coyne J. A., 1986 Meiotic segregation and male recombination in interspecific hybrids of *Drosophila*.  
642 *Genetics* 114: 485–494.

- 643 Coyne J. A., 1989 Mutation rates in hybrids between sibling species of *Drosophila*. *Heredity* 63 ( Pt 2):  
644 155–162. <https://doi.org/10.1038/hdy.1989.87>
- 645 Crespi B., and P. Nosil, 2013 Conflictual speciation: species formation via genomic conflict. *Trends Ecol.*  
646 *Evol.* 28: 48–57. <https://doi.org/10.1016/j.tree.2012.08.015>
- 647 Curcio M. J., and D. J. Garfinkel, 1991 Single-step selection for Ty1 element retrotransposition. *Proc.*  
648 *Natl. Acad. Sci. U. S. A.* 88: 936–940. <https://doi.org/10.1073/pnas.88.3.936>
- 649 Curcio M. J., and D. J. Garfinkel, 1992 Posttranslational control of Ty1 retrotransposition occurs at the  
650 level of protein processing. *Mol. Cell. Biol.* 12: 2813–2825.
- 651 Czaja W., D. Bensasson, H. W. Ahn, D. J. Garfinkel, and C. M. Bergman, 2020 Evolution of Ty1 copy  
652 number control in yeast by horizontal transfer and recombination. *PLOS Genet.* 16: e1008632.  
653 <https://doi.org/10.1371/journal.pgen.1008632>
- 654 Dechaud C., J.-N. Volf, M. Schartl, and M. Naville, 2019 Sex and the TEs: transposable elements in  
655 sexual development and function in animals. *Mob. DNA* 10: 42. [https://doi.org/10.1186/s13100-](https://doi.org/10.1186/s13100-019-0185-0)  
656 [019-0185-0](https://doi.org/10.1186/s13100-019-0185-0)
- 657 Disdero E., and J. Filée, 2017 LoRTE: Detecting transposon-induced genomic variants using low  
658 coverage PacBio long read sequences. *Mob. DNA* 8: 5. [https://doi.org/10.1186/s13100-017-0088-](https://doi.org/10.1186/s13100-017-0088-x)  
659 [x](https://doi.org/10.1186/s13100-017-0088-x)
- 660 Dowling D. K., 2014 Evolutionary perspectives on the links between mitochondrial genotype and disease  
661 phenotype. *Biochim. Biophys. Acta BBA - Gen. Subj.* 1840: 1393–1403.  
662 <https://doi.org/10.1016/j.bbagen.2013.11.013>
- 663 Drinnenberg I. A., D. E. Weinberg, K. T. Xie, J. P. Mower, K. H. Wolfe, *et al.*, 2009 RNAi in budding  
664 yeast. *Science* 326: 544–550. <https://doi.org/10.1126/science.1176945>

- 665 Duchen M. R., and G. Szabadkai, 2010 Roles of mitochondria in human disease. *Essays Biochem.* 47:  
666 115–137. <https://doi.org/10.1042/bse0470115>
- 667 Dujon B., 2020 Mitochondrial genetics revisited. *Yeast* 37: 191–205. <https://doi.org/10.1002/yea.3445>
- 668 Dunham M. J., M. Gartenberg, and G. W. Brown, 2015 *Methods in Yeast Genetics and Genomics, 2015*  
669 *Edition: A CSHL Course Manual*. Cold Spring Harbor Laboratory Press.
- 670 Elder R. T., T. P. St John, D. T. Stinchcomb, R. W. Davis, S. Scherer, *et al.*, 1981 Studies on the  
671 transposable element Ty1 of yeast. I. RNA homologous to Ty1. II. Recombination and expression  
672 of Ty1 and adjacent sequences. *Cold Spring Harb. Symp. Quant. Biol.* 45 Pt 2: 581–591.  
673 <https://doi.org/10.1101/sqb.1981.045.01.075>
- 674 Ellison C. E., and D. Bachtrog, 2013 Dosage Compensation via Transposable Element Mediated  
675 Rewiring of a Regulatory Network. *Science* 342: 846–850.  
676 <https://doi.org/10.1126/science.1239552>
- 677 Esnault C., M. Lee, C. Ham, and H. L. Levin, 2019 Transposable element insertions in fission yeast drive  
678 adaptation to environmental stress. *Genome Res.* 29: 85–95.  
679 <https://doi.org/10.1101/gr.239699.118>
- 680 Ewing A. D., 2015 Transposable element detection from whole genome sequence data. *Mob. DNA* 6: 24.  
681 <https://doi.org/10.1186/s13100-015-0055-3>
- 682 Gao D., N. Jiang, R. A. Wing, J. Jiang, and S. A. Jackson, 2015 Transposons play an important role in the  
683 evolution and diversification of centromeres among closely related species. *Front. Plant Sci.* 6.  
684 <https://doi.org/10.3389/fpls.2015.00216>
- 685 Garfinkel D. J., K. Nyswaner, J. Wang, and J.-Y. Cho, 2003 Post-transcriptional cosuppression of Ty1  
686 retrotransposition. *Genetics* 165: 83–99.

- 687 Garfinkel D. J., K. M. Nyswaner, K. M. Stefanisko, C. Chang, and S. P. Moore, 2005 Ty1 Copy Number  
688 Dynamics in *Saccharomyces*. *Genetics* 169: 1845–1857.  
689 <https://doi.org/10.1534/genetics.104.037317>
- 690 Garfinkel D. J., J. M. Tucker, A. Saha, Y. Nishida, K. Pachulska-Wieczorek, *et al.*, 2016 A self-encoded  
691 capsid derivative restricts Ty1 retrotransposition in *Saccharomyces*. *Curr. Genet.* 62: 321–329.  
692 <https://doi.org/10.1007/s00294-015-0550-6>
- 693 Gershoni M., A. R. Templeton, and D. Mishmar, 2009 Mitochondrial bioenergetics as a major motive  
694 force of speciation. *BioEssays* 31: 642–650. <https://doi.org/10.1002/bies.200800139>
- 695 Göbel U., A. L. Arce, F. He, A. Rico, G. Schmitz, *et al.*, 2018 Robustness of Transposable Element  
696 Regulation but No Genomic Shock Observed in Interspecific *Arabidopsis* Hybrids. *Genome Biol.*  
697 *Evol.* 10: 1403–1415. <https://doi.org/10.1093/gbe/evy095>
- 698 González J., K. Lenkov, M. Lipatov, J. M. Macpherson, and D. A. Petrov, 2008 High Rate of Recent  
699 Transposable Element–Induced Adaptation in *Drosophila melanogaster*. *PLOS Biol.* 6: e251.  
700 <https://doi.org/10.1371/journal.pbio.0060251>
- 701 González J., and D. A. Petrov, 2009 The Adaptive Role of Transposable Elements in the *Drosophila*  
702 Genome. *Gene* 448: 124–133. <https://doi.org/10.1016/j.gene.2009.06.008>
- 703 González J., T. L. Karasov, P. W. Messer, and D. A. Petrov, 2010 Genome-Wide Patterns of Adaptation  
704 to Temperate Environments Associated with Transposable Elements in *Drosophila*. *PLOS Genet.*  
705 6: e1000905. <https://doi.org/10.1371/journal.pgen.1000905>
- 706 Gregory T. R., and J. S. Johnston, 2008 Genome size diversity in the family *Drosophilidae*. *Heredity* 101:  
707 228–238. <https://doi.org/10.1038/hdy.2008.49>

- 708 Hansen L. J., and S. B. Sandmeyer, 1990 Characterization of a transpositionally active Ty3 element and  
709 identification of the Ty3 integrase protein. *J. Virol.* 64: 2599–2607.
- 710 Herskowitz I., 1988 Life cycle of the budding yeast *Saccharomyces cerevisiae*. *Microbiol. Rev.* 52: 536–  
711 553.
- 712 Hewitt S. K., K. Duangrattanalert, T. Burgis, L. A. H. Zeef, S. Naseeb, *et al.*, 2020 Plasticity of  
713 Mitochondrial DNA Inheritance and Its Impact on Nuclear Gene Transcription in Yeast Hybrids.  
714 *Microorganisms* 8: 494. <https://doi.org/10.3390/microorganisms8040494>
- 715 Hey J., 1988 Speciation via hybrid dysgenesis: negative evidence from the *Drosophila affinis* subgroup.  
716 *Genetica* 78: 97–103. <https://doi.org/10.1007/BF00058840>
- 717 Hoffman C. S., and F. Winston, 1987 A ten-minute DNA preparation from yeast efficiently releases  
718 autonomous plasmids for transformation of *Escherichia coli*. *Gene* 57: 267–272.  
719 [https://doi.org/10.1016/0378-1119\(87\)90131-4](https://doi.org/10.1016/0378-1119(87)90131-4)
- 720 Hope E. A., C. J. Amorosi, A. W. Miller, K. Dang, C. S. Heil, *et al.*, 2017 Experimental Evolution  
721 Reveals Favored Adaptive Routes to Cell Aggregation in Yeast. *Genetics* 206: 1153–1167.  
722 <https://doi.org/10.1534/genetics.116.198895>
- 723 Hose J., L. E. Escalante, K. J. Clowers, H. A. Dutcher, D. Robinson, *et al.*, 2020 The genetic basis of  
724 aneuploidy tolerance in wild yeast, (H. Klein, J. K. Tyler, D. Gresham, J. L. Argueso, and K.  
725 Bloom, Eds.). *eLife* 9: e52063. <https://doi.org/10.7554/eLife.52063>
- 726 Hsu Y.-Y., and J.-Y. Chou, 2017 Environmental Factors Can Influence Mitochondrial Inheritance in the  
727 *Saccharomyces* Yeast Hybrids. *PLOS ONE* 12: e0169953.  
728 <https://doi.org/10.1371/journal.pone.0169953>



- 729 Hug A. M., and H. Feldmann, 1996 Yeast retrotransposon Ty4: the majority of the rare transcripts lack a  
730 U3-R sequence. *Nucleic Acids Res.* 24: 2338–2346. <https://doi.org/10.1093/nar/24.12.2338>
- 731 Jangam D., C. Feschotte, and E. Betrán, 2017 Transposable Element Domestication As an Adaptation to  
732 Evolutionary Conflicts. *Trends Genet. TIG* 33: 817–831.  
733 <https://doi.org/10.1016/j.tig.2017.07.011>
- 734 Jiang N., Z. Bao, X. Zhang, S. R. Eddy, and S. R. Wessler, 2004 Pack-MULE transposable elements  
735 mediate gene evolution in plants. *Nature* 431: 569–573. <https://doi.org/10.1038/nature02953>
- 736 Josefsson C., B. Dilkes, and L. Comai, 2006 Parent-dependent loss of gene silencing during interspecies  
737 hybridization. *Curr. Biol. CB* 16: 1322–1328. <https://doi.org/10.1016/j.cub.2006.05.045>
- 738 Kapusta A., A. Suh, and C. Feschotte, 2017 Dynamics of genome size evolution in birds and mammals.  
739 *Proc. Natl. Acad. Sci.* 114: E1460–E1469. <https://doi.org/10.1073/pnas.1616702114>
- 740 Kawakami T., P. Dhakal, A. N. Katterhenry, C. A. Heatherington, and M. C. Ungerer, 2011 Transposable  
741 Element Proliferation and Genome Expansion Are Rare in Contemporary Sunflower Hybrid  
742 Populations Despite Widespread Transcriptional Activity of LTR Retrotransposons. *Genome*  
743 *Biol. Evol.* 3: 156–167. <https://doi.org/10.1093/gbe/evr005>
- 744 Keane T. M., K. Wong, and D. J. Adams, 2013 RetroSeq: transposable element discovery from next-  
745 generation sequencing data. *Bioinforma. Oxf. Engl.* 29: 389–390.  
746 <https://doi.org/10.1093/bioinformatics/bts697>
- 747 Kelleher E. S., N. B. Edelman, and D. A. Barbash, 2012 *Drosophila* Interspecific Hybrids Phenocopy  
748 piRNA-Pathway Mutants. *PLOS Biol.* 10: e1001428.  
749 <https://doi.org/10.1371/journal.pbio.1001428>

- 750 Kidwell M. G., J. F. Kidwell, and J. A. Sved, 1977 Hybrid Dysgenesis in *DROSOPHILA*  
751 *MELANOGASTER*: A Syndrome of Aberrant Traits Including Mutation, Sterility and Male  
752 Recombination. *Genetics* 86: 813–833.
- 753 Kidwell M. G., 1983 Evolution of hybrid dysgenesis determinants in *Drosophila melanogaster*. *Proc.*  
754 *Natl. Acad. Sci. U. S. A.* 80: 1655–1659.
- 755 Kim J. M., S. Vanguri, J. D. Boeke, A. Gabriel, and D. F. Voytas, 1998 Transposable elements and  
756 genome organization: a comprehensive survey of retrotransposons revealed by the complete  
757 *Saccharomyces cerevisiae* genome sequence. *Genome Res.* 8: 464–478.  
758 <https://doi.org/10.1101/gr.8.5.464>
- 759 Kofler R., K.-A. Senti, V. Nolte, R. Tobler, and C. Schlötterer, 2018 Molecular dissection of a natural  
760 transposable element invasion. *Genome Res.* 28: 824–835. <https://doi.org/10.1101/gr.228627.117>
- 761 Kursel L. E., and H. S. Malik, 2016 Centromeres. *Curr. Biol.* CB 26: R487–R490.  
762 <https://doi.org/10.1016/j.cub.2016.05.031>
- 763 Kutter C., P. Jern, and A. Suh, 2018 Bridging gaps in transposable element research with single-molecule  
764 and single-cell technologies. *Mob. DNA* 9: 34. <https://doi.org/10.1186/s13100-018-0140-5>
- 765 Labrador M., M. Farré, F. Utzet, and A. Fontdevila, 1999 Interspecific hybridization increases  
766 transposition rates of *Osvaldo*. *Mol. Biol. Evol.* 16: 931–937.  
767 <https://doi.org/10.1093/oxfordjournals.molbev.a026182>
- 768 Lea D. E., and C. A. Coulson, 1949 The distribution of the numbers of mutants in bacterial populations. *J.*  
769 *Genet.* 49: 264. <https://doi.org/10.1007/BF02986080>

- 770 Lee H.-Y., J.-Y. Chou, L. Cheong, N.-H. Chang, S.-Y. Yang, *et al.*, 2008 Incompatibility of Nuclear and  
771 Mitochondrial Genomes Causes Hybrid Sterility between Two Yeast Species. *Cell* 135: 1065–  
772 1073. <https://doi.org/10.1016/j.cell.2008.10.047>
- 773 Li H., and R. Durbin, 2009 Fast and accurate short read alignment with Burrows-Wheeler transform.  
774 *Bioinforma. Oxf. Engl.* 25: 1754–1760. <https://doi.org/10.1093/bioinformatics/btp324>
- 775 Li Z.-W., X.-H. Hou, J.-F. Chen, Y.-C. Xu, Q. Wu, *et al.*, 2018 Transposable Elements Contribute to the  
776 Adaptation of *Arabidopsis thaliana*. *Genome Biol. Evol.* 10: 2140–2150.  
777 <https://doi.org/10.1093/gbe/evy171>
- 778 Li X. C., D. Peris, C. T. Hittinger, E. A. Sia, and J. C. Fay, 2019 Mitochondria-encoded genes contribute  
779 to evolution of heat and cold tolerance in yeast. *Sci. Adv.* 5: eaav1848.  
780 <https://doi.org/10.1126/sciadv.aav1848>
- 781 Liti G., A. Peruffo, S. A. James, I. N. Roberts, and E. J. Louis, 2005 Inferences of evolutionary  
782 relationships from a population survey of LTR-retrotransposons and telomeric-associated  
783 sequences in the *Saccharomyces sensu stricto* complex. *Yeast Chichester Engl.* 22: 177–192.  
784 <https://doi.org/10.1002/yea.1200>
- 785 Lozovskaya E. R., V. S. Scheinker, and M. B. Evgen'ev, 1990 A hybrid dysgenesis syndrome in  
786 *Drosophila virilis*. *Genetics* 126: 619–623.
- 787 Malina C., C. Larsson, and J. Nielsen, 2018 Yeast mitochondria: an overview of mitochondrial biology  
788 and the potential of mitochondrial systems biology. *FEMS Yeast Res.* 18.  
789 <https://doi.org/10.1093/femsyr/foy040>
- 790 Marinoni G., M. Manuel, R. F. Petersen, J. Hvidtfeldt, P. Sulo, *et al.*, 1999 Horizontal Transfer of Genetic  
791 Material among *Saccharomyces* Yeasts. *J. Bacteriol.* 181: 6488–6496.

- 792 McClintock B., 1984 The significance of responses of the genome to challenge. *Science* 226: 792–801.  
793 <https://doi.org/10.1126/science.15739260>
- 794 Mishmar D., E. Ruiz-Pesini, P. Golik, V. Macaulay, A. G. Clark, *et al.*, 2003 Natural selection shaped  
795 regional mtDNA variation in humans. *Proc. Natl. Acad. Sci. U. S. A.* 100: 171–176.  
796 <https://doi.org/10.1073/pnas.0136972100>
- 797 Moore S. P., G. Liti, K. M. Stefanisko, K. M. Nyswaner, C. Chang, *et al.*, 2004 Analysis of a Ty1-less  
798 variant of *Saccharomyces paradoxus*: the gain and loss of Ty1 elements. *Yeast* Chichester Engl.  
799 21: 649–660. <https://doi.org/10.1002/yea.1129>
- 800 Mularoni L., Y. Zhou, T. Bowen, S. Gangadharan, S. J. Wheelan, *et al.*, 2012 Retrotransposon Ty1  
801 integration targets specifically positioned asymmetric nucleosomal DNA segments in tRNA  
802 hotspots. *Genome Res.* 22: 693–703. <https://doi.org/10.1101/gr.129460.111>
- 803 Neuvéglise C., H. Feldmann, E. Bon, C. Gaillardin, and S. Casaregola, 2002 Genomic Evolution of  
804 the Long Terminal Repeat Retrotransposons in Hemiascomycetous Yeasts. *Genome Res.* 12:  
805 930–943. <https://doi.org/10.1101/gr.219202>
- 806 Niu X.-M., Y.-C. Xu, Z.-W. Li, Y.-T. Bian, X.-H. Hou, *et al.*, 2019 Transposable elements drive rapid  
807 phenotypic variation in *Capsella rubella*. *Proc. Natl. Acad. Sci.* 116: 6908–6913.  
808 <https://doi.org/10.1073/pnas.1811498116>
- 809 Opijnen T. van, K. L. Bodi, and A. Camilli, 2009 Tn-seq: high-throughput parallel sequencing for fitness  
810 and genetic interaction studies in microorganisms. *Nat. Methods* 6: 767–772.  
811 <https://doi.org/10.1038/nmeth.1377>
- 812 Paquin C. E., and V. M. Williamson, 1984 Temperature Effects on the Rate of Ty Transposition. *Science*  
813 226: 53–55.

- 814 Pardue M.-L., and P. G. DeBaryshe, 2011 Retrotransposons that maintain chromosome ends. *Proc. Natl.*  
815 *Acad. Sci. U. S. A.* 108: 20317–20324. <https://doi.org/10.1073/pnas.1100278108>
- 816 Pellicer J., L. J. Kelly, I. J. Leitch, W. B. Zomlefer, and M. F. Fay, 2014 A universe of dwarfs and giants:  
817 genome size and chromosome evolution in the monocot family Melanthiaceae. *New Phytol.* 201:  
818 1484–1497. <https://doi.org/10.1111/nph.12617>
- 819 Petrov D. A., 2002 Mutational equilibrium model of genome size evolution. *Theor. Popul. Biol.* 61: 531–  
820 544. <https://doi.org/10.1006/tpbi.2002.1605>
- 821 Quinlan A. R., and I. M. Hall, 2010 BEDTools: a flexible suite of utilities for comparing genomic  
822 features. *Bioinforma. Oxf. Engl.* 26: 841–842. <https://doi.org/10.1093/bioinformatics/btq033>
- 823 Rebollo R., M. T. Romanish, and D. L. Mager, 2012 Transposable elements: an abundant and natural  
824 source of regulatory sequences for host genes. *Annu. Rev. Genet.* 46: 21–42.  
825 <https://doi.org/10.1146/annurev-genet-110711-155621>
- 826 Renaut S., H. C. Rowe, M. C. Ungerer, and L. H. Rieseberg, 2014 Genomics of homoploid hybrid  
827 speciation: diversity and transcriptional activity of long terminal repeat retrotransposons in hybrid  
828 sunflowers. *Philos. Trans. R. Soc. B Biol. Sci.* 369. <https://doi.org/10.1098/rstb.2013.0345>
- 829 Rishishwar L., L. Mariño-Ramírez, and I. K. Jordan, 2017 Benchmarking computational tools for  
830 polymorphic transposable element detection. *Brief. Bioinform.* 18: 908–918.  
831 <https://doi.org/10.1093/bib/bbw072>
- 832 Robinson J. T., H. Thorvaldsdóttir, W. Winckler, M. Guttman, E. S. Lander, *et al.*, 2011 Integrative  
833 genomics viewer. *Nat. Biotechnol.* 29: 24–26. <https://doi.org/10.1038/nbt.1754>
- 834 Rose M. R., and W. F. Doolittle, 1983 Molecular biological mechanisms of speciation. *Science* 220: 157–  
835 162. <https://doi.org/10.1126/science.220.4593.157>

- 836 Ruiz-Pesini E., D. Mishmar, M. Brandon, V. Procaccio, and D. C. Wallace, 2004 Effects of purifying and  
837 adaptive selection on regional variation in human mtDNA. *Science* 303: 223–226.  
838 <https://doi.org/10.1126/science.1088434>
- 839 Saha A., J. A. Mitchell, Y. Nishida, J. E. Hildreth, J. A. Ariberre, *et al.*, 2015 A trans-dominant form of  
840 Gag restricts Ty1 retrotransposition and mediates copy number control. *J. Virol.* 89: 3922–3938.  
841 <https://doi.org/10.1128/JVI.03060-14>
- 842 Sanchez M. R., C. Payen, F. Cheong, B. T. Hovde, S. Bissonnette, *et al.*, 2019 Transposon insertional  
843 mutagenesis in *Saccharomyces uvarum* reveals trans-acting effects influencing species-dependent  
844 essential genes. *Genome Res.* 29: 396–406. <https://doi.org/10.1101/gr.232330.117>
- 845 Scannell D. R., O. A. Zill, A. Rokas, C. Payen, M. J. Dunham, *et al.*, 2011 The Awesome Power of Yeast  
846 Evolutionary Genetics: New Genome Sequences and Strain Resources for the *Saccharomyces*  
847 *sensu stricto* Genus. *G3 Genes Genomes Genet.* 1: 11–25. <https://doi.org/10.1534/g3.111.000273>
- 848 Scheifele L. Z., G. J. Cost, M. L. Zupancic, E. M. Caputo, and J. D. Boeke, 2009 Retrotransposon  
849 overdose and genome integrity. *Proc. Natl. Acad. Sci.* 106: 13927–13932.  
850 <https://doi.org/10.1073/pnas.0906552106>
- 851 Schubert I., and G. T. H. Vu, 2016 Genome Stability and Evolution: Attempting a Holistic View. *Trends*  
852 *Plant Sci.* 21: 749–757. <https://doi.org/10.1016/j.tplants.2016.06.003>
- 853 Shahid S., and R. K. Slotkin, 2020 The current revolution in transposable element biology enabled by  
854 long reads. *Curr. Opin. Plant Biol.* 54: 49–56. <https://doi.org/10.1016/j.pbi.2019.12.012>
- 855 Smukowski Heil C. S., C. G. DeSevo, D. A. Pai, C. M. Tucker, M. L. Hoang, *et al.*, 2017 Loss of  
856 Heterozygosity Drives Adaptation in Hybrid Yeast. *Mol. Biol. Evol.* 34: 1596–1612.  
857 <https://doi.org/10.1093/molbev/msx098>

- 858 Smukowski Heil C. S., C. R. L. Large, K. Patterson, A. S.-M. Hickey, C.-L. C. Yeh, *et al.*, 2019  
859 Temperature preference can bias parental genome retention during hybrid evolution. PLOS  
860 Genet. 15: e1008383. <https://doi.org/10.1371/journal.pgen.1008383>
- 861 Staton S. E., M. C. Ungerer, and R. C. Moore, 2009 The genomic organization of Ty3/gypsy-like  
862 retrotransposons in *Helianthus* (Asteraceae) homoploid hybrid species. Am. J. Bot. 96: 1646–  
863 1655. <https://doi.org/10.3732/ajb.0800337>
- 864 Stoebel D. M., and C. J. Dorman, 2010 The Effect of Mobile Element IS10 on Experimental Regulatory  
865 Evolution in *Escherichia coli*. Mol. Biol. Evol. 27: 2105–2112.  
866 <https://doi.org/10.1093/molbev/msq101>
- 867 Thybert D., M. Roller, F. C. P. Navarro, I. Fiddes, I. Streeter, *et al.*, 2018 Repeat associated mechanisms  
868 of genome evolution and function revealed by the *Mus caroli* and *Mus pahari* genomes. Genome  
869 Res. <https://doi.org/10.1101/gr.234096.117>
- 870 Ungerer M. C., S. C. Strakosh, and Y. Zhen, 2006 Genome expansion in three hybrid sunflower species is  
871 associated with retrotransposon proliferation. Curr. Biol. 16: R872–R873.  
872 <https://doi.org/10.1016/j.cub.2006.09.020>
- 873 Ungerer M. C., S. C. Strakosh, and K. M. Stimpson, 2009 Proliferation of Ty3/gypsy-like  
874 retrotransposons in hybrid sunflower taxa inferred from phylogenetic data. BMC Biol. 7: 40.  
875 <https://doi.org/10.1186/1741-7007-7-40>
- 876 Ungerer M. C., and T. Kawakami, 2013 Transcriptional Dynamics of LTR Retrotransposons in Early  
877 Generation and Ancient Sunflower Hybrids. Genome Biol. Evol. 5: 329–337.  
878 <https://doi.org/10.1093/gbe/evt006>

- 879 Vafai S. B., and V. K. Mootha, 2012 Mitochondrial disorders as windows into an ancient organelle.  
880 Nature 491: 374–383. <https://doi.org/10.1038/nature11707>
- 881 Van't Hof A. E., P. Campagne, D. J. Rigden, C. J. Yung, J. Lingley, *et al.*, 2016 The industrial melanism  
882 mutation in British peppered moths is a transposable element. Nature 534: 102–105.  
883 <https://doi.org/10.1038/nature17951>
- 884 Voytas D. F., and J. D. Boeke, 1992 Yeast retrotransposon revealed. Nature 358: 717.  
885 <https://doi.org/10.1038/358717a0>
- 886 Wallace D. C., 2007 Why do we still have a maternally inherited mitochondrial DNA? Insights from  
887 evolutionary medicine. Annu. Rev. Biochem. 76: 781–821.  
888 <https://doi.org/10.1146/annurev.biochem.76.081205.150955>
- 889 Wetmore K. M., M. N. Price, R. J. Waters, J. S. Lamson, J. He, *et al.*, 2015 Rapid Quantification of  
890 Mutant Fitness in Diverse Bacteria by Sequencing Randomly Bar-Coded Transposons. mBio 6:  
891 e00306-15. <https://doi.org/10.1128/mBio.00306-15>
- 892 Wilke C. M., E. Maimer, and J. Adams, 1992 The population biology and evolutionary significance of Ty  
893 elements in *Saccharomyces cerevisiae*. Genetica 86: 155–173.  
894 <https://doi.org/10.1007/BF00133718>
- 895 Wolfe K. H., D. Armisén, E. Proux-Wera, S. S. ÓhÉigearthaigh, H. Azam, *et al.*, 2015 Clade- and species-  
896 specific features of genome evolution in the Saccharomycetaceae. FEMS Yeast Res. 15: fov035.  
897 <https://doi.org/10.1093/femsyr/fov035>
- 898



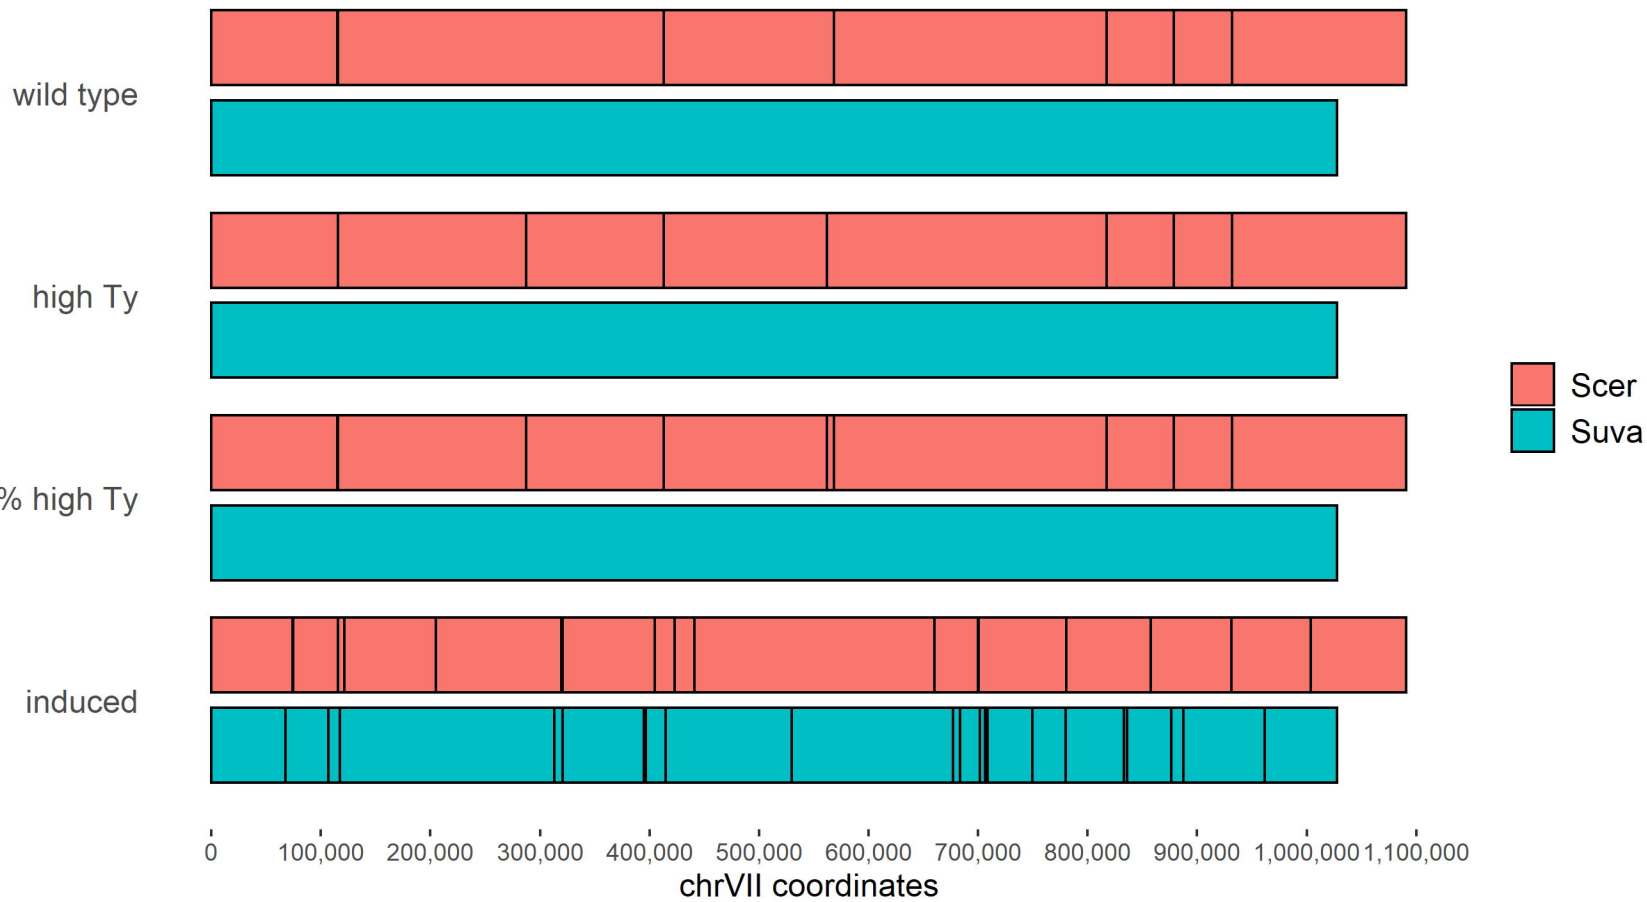

Source: https://biorxiv.org/content/10.1101/2020.06.16.155218v1.full.pdf
